# Supplementary material for: Control of mitophagy initiation and progression by the TBK1 adaptors NAP1 and SINTBAD
Source: PubMed Central journal article supplement (PMC11564117; doi:10.1038/s41594-024-01338-y), 2024-06-25
Supplement: 41594_2024_1338_MOESM1_ESM.pdf [file 41594_2024_1338_MOESM1_ESM.pdf]

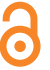

---

# Control of mitophagy initiation and progression by the TBK1 adaptors NAP1 and SINTBAD

---

In the format provided by the authors and unedited

---

## Supplementary information

### FACS Gating strategy for O/A induced mitophagy

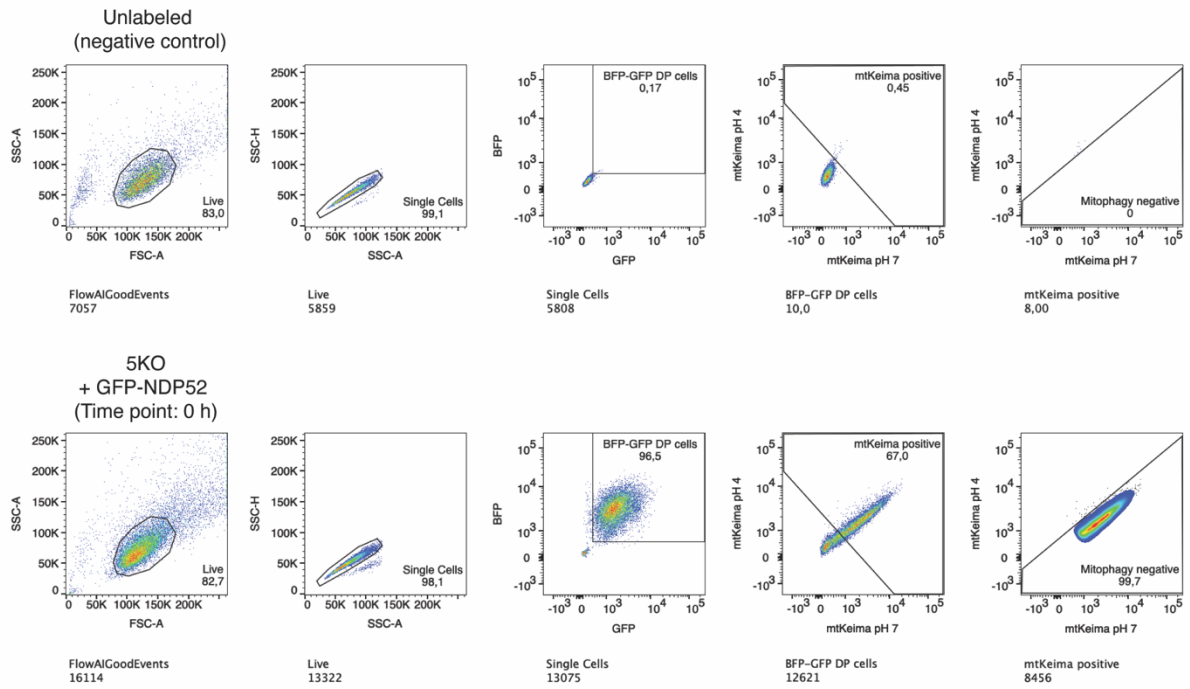

### FACS Gating strategy for Rapalog induced mitophagy

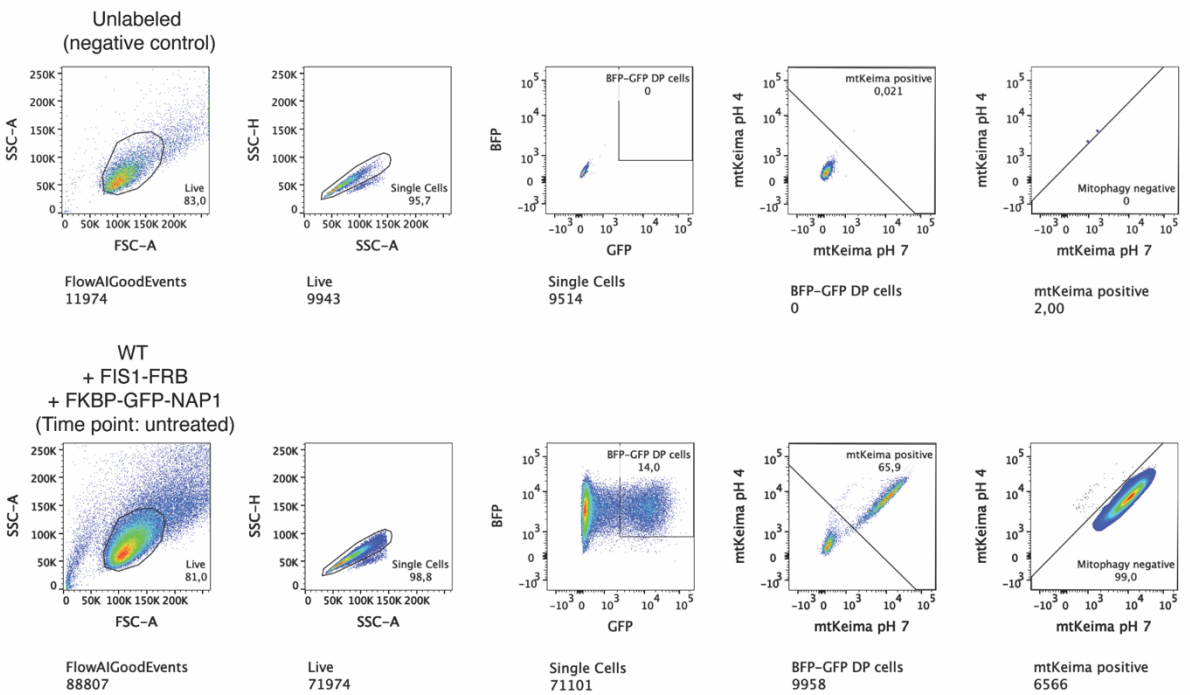

### **Supplementary Figure 1**

Gating strategy for FACS experiments where cells were either treated with O/A or Rapalog. Unstained negative controls are shown. BFP-GFP DP cells represent BFP and GFP double positive (DP) cells. The numbers below each gate represent the number of cells that were gated from the previous plot into the current plot. For instance, 8456 mtKeima positive cells means that a total of 8456 cells are displayed on the mtKeima plot of which only a fraction (indicated in the figures of the main manuscript) are mtKeima positive.

**Supplementary Table 1: Details of CRISPR /Cas9-edited cell lines generated this study.**

| Gene Symbol                             | Uniprot | GeneID / Location | Targeting strategy | CRISPR gRNA (PAM)       | Clone number                   | Potential unique Alleles | Mutation                                                                                                                                                                 | Protein impact                                                                                                                                                              |
|-----------------------------------------|---------|-------------------|--------------------|-------------------------|--------------------------------|--------------------------|--------------------------------------------------------------------------------------------------------------------------------------------------------------------------|-----------------------------------------------------------------------------------------------------------------------------------------------------------------------------|
| <b>SINTBAD KO</b>                       |         |                   |                    |                         |                                |                          |                                                                                                                                                                          |                                                                                                                                                                             |
| <i>SINTBAD/TBKBP1</i>                   | A7MCY6  | 9755/NC_00017.11  | Exon 1             | AGTCCCGGAGACCCCTCGCTIGG | #7                             | 3                        | c.[92_95del];[93_94insG];[-200bp del, ~200bp ins]                                                                                                                        | p.[S31Lfs*46];[L32AFS*49];[frameshifting and introducing stop codon]                                                                                                        |
| <b>NAP1 KO</b>                          |         |                   |                    |                         |                                |                          |                                                                                                                                                                          |                                                                                                                                                                             |
| <i>NAP1/AZI2</i>                        | Q9H6S1  | 64343/NC_00003.12 | Exon 6             | CAAATGACAGGATCCATATCAGG | #32                            | 3                        | c.[588_640del];[591_602del];[588_640del]                                                                                                                                 | p.[D197Ffs*2];[D197_Q200del];[D197Ffs*2]                                                                                                                                    |
|                                         |         |                   |                    |                         | #62                            | 3                        | c.[589_592del];[588_595del];[599-176_644del]                                                                                                                             | p.[D197Hfs*6];[D197Sfs*17];[D197Kfs*1]                                                                                                                                      |
| <b>NAP1/SINTBAD DKO</b>                 |         |                   |                    |                         |                                |                          |                                                                                                                                                                          |                                                                                                                                                                             |
| <i>NAP1/AZI2</i>                        | Q9H6S1  | 64343/NC_00003.12 | Exon 6             | CAAATGACAGGATCCATATCAGG | #14<br>(made from NAP1 KO #62) | 3                        | c.[589_592del];[588_595del];[599-176_644del]                                                                                                                             | p.[D197Hfs*6];[D197Sfs*17];[D197Kfs*1]                                                                                                                                      |
| <i>SINTBAD/TBKBP1</i>                   | A7MCY6  | 9755/NC_00017.11  | Exon 1             | AGTCCCGGAGACCCCTCGCTIGG | #14<br>(made from NAP1 KO #62) | 2                        | c.[92_96del];[92_102del]                                                                                                                                                 | p.[S31Wfs*48];[S31*]                                                                                                                                                        |
| <b>NAP1/SINTBAD DKO/penta KO</b>        |         |                   |                    |                         |                                |                          |                                                                                                                                                                          |                                                                                                                                                                             |
| <i>NAP1/AZI2</i>                        | Q9H6S1  | 64343/NC_00003.12 | Exon 6             | CAAATGACAGGATCCATATCAGG | #20                            | 11                       | c.[595_596ins1bp]/[595_596ins5bp]/[595_596ins20bp];[576_610del];[586_607del];[576_614del];[576_609del];[579_615del];[582_609del];[587_609del];[595_596del]               | p.[frameshifting and introducing stop codon];[K192Nfs*13];[T196ifs*1];[A193_K205del];[K192Nfs*1];[K194Afs*6];[K194Nfs*1];[D197Efs*12];[Y199Sfs*17]                          |
|                                         |         |                   |                    |                         | #26                            | 1                        | c.[595_596ins1bp]                                                                                                                                                        | p.[frameshifting and introducing stop codon]                                                                                                                                |
| <i>SINTBAD/TBKBP1</i>                   | A7MCY6  | 9755/NC_00017.11  | Exon 1             | AGTCCCGGAGACCCCTCGCTIGG | #20                            | 1                        | c.[92_93ins1bp]                                                                                                                                                          | p.[frameshifting and introducing stop codon]                                                                                                                                |
|                                         |         |                   |                    |                         | #26                            | 4                        | c.[92_93ins1bp];[82_92del];[93_104del];[92_103del]                                                                                                                       | p.[frameshifting and introducing stop codon];[G28_S31del];[L32_D35del];[S31_G34del]                                                                                         |
| <b>NAP1/SINTBAD/ULK1/2 4KO/penta KO</b> |         |                   |                    |                         |                                |                          |                                                                                                                                                                          |                                                                                                                                                                             |
| <i>NAP1/AZI2</i>                        | Q9H6S1  | 64343/NC_00003.12 | Exon 6             | CAAATGACAGGATCCATATCAGG | #27                            | 5                        | c.[595_596ins8bp];[596_636delins47bp];[596_636delins43bp];[595_636delins29bp];[596_636delins30]                                                                          | p.[frameshifting and introducing stop codon];[199_212delins16a.a.];[Y199*];[Y199Sfs*23];[199_212delins16a.a.];[Y199*]                                                       |
| <i>SINTBAD/TBKBP1</i>                   | A7MCY6  | 9755/NC_00017.11  | Exon 1             | AGTCCCGGAGACCCCTCGCTIGG | #27                            | 13                       | c.[92_93ins20bp]/[92_93ins19bp]/[92_93ins11bp];[92_93ins18bp];[78_112del];[87_112del];[89_112del];[91_92del];[75_112del];[90_112del];[91_110del];[91_103del];[92_109del] | p.[frameshifting and introducing stop codon];[S31_L32ins6a.a.];[P27Rfs*42];[p30rFS*42];[S31_S38del];[S31Afs*49];[S26Rfs*42];[S31Rfs*42];[S31Lfs42*];[S31Tfs*6];[S31_M36del] |

The indels in the indicated knockout cell lines were sequenced by Sanger sequencing and analyzed via Synthego by ICE v2 CRISPR Analysis Tool ([synthego.com/products/bioinformatics/crispr-analysis](https://synthego.com/products/bioinformatics/crispr-analysis)) to detect possible edits and their effects on the translated proteins are presented in

“Mutation” column and “Protein impact” column respectively. The format in these columns was done according to Human Genome Variation Society (HGVS; <http://varnomen.hgvs.org/> ). With genes that have multiple splice variants, the canonical isoform chosen by Uniprot was used to determine mutation positions. del = deletion; ins = insertion; c. = coding DNA; bp = base pair; p. = protein; fs = frame shift; \* = stop codon; [?] = affecting splicing; a.a = amino acid. The numbers after the asterisks denote the numbers of amino acids between the first amino acid changed following the mutation(s) and the first subsequent stop codon encountered.
