# Supplementary material for: Control of mitophagy initiation and progression by the TBK1 adaptors NAP1 and SINTBAD
Source: PubMed Central journal article supplement (PMC11564117; doi:10.1038/s41594-024-01338-y), 2024-06-25

Extended Data Figure 4A

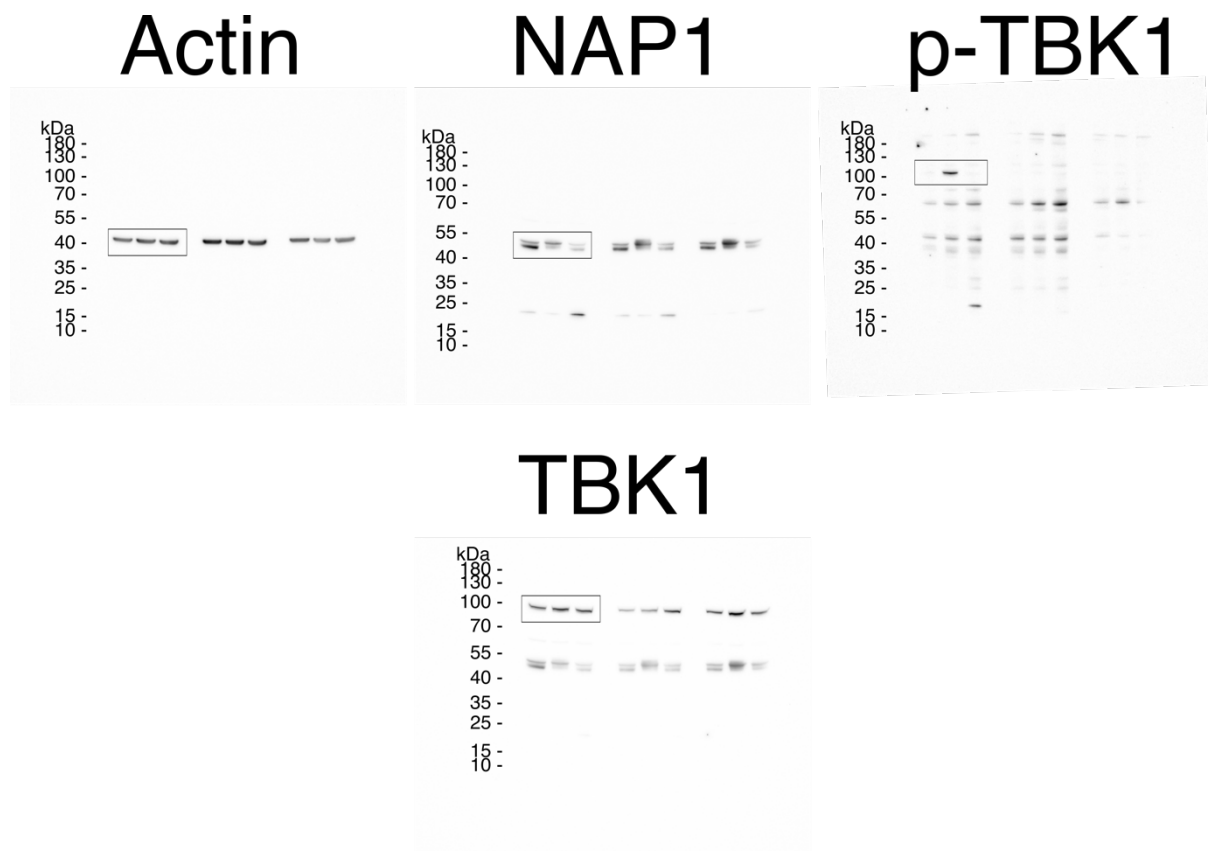

Extended Data Figure 4B

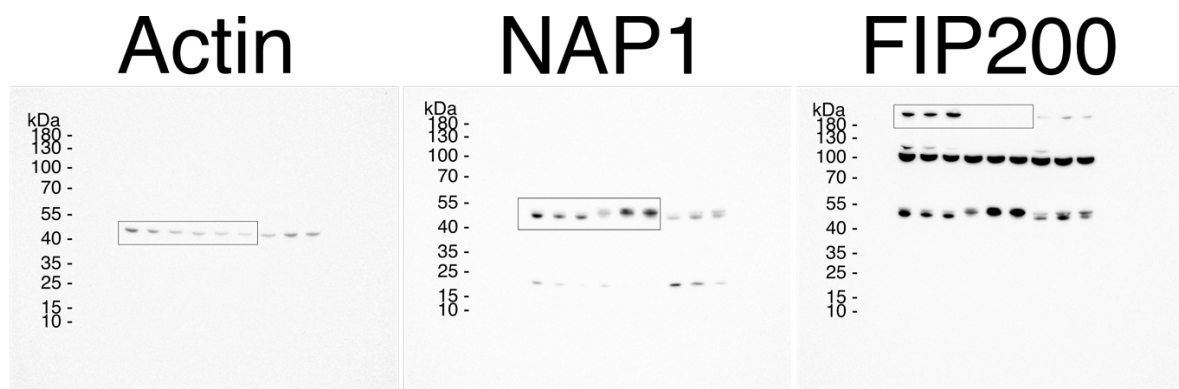

Extended Data Figure 4E

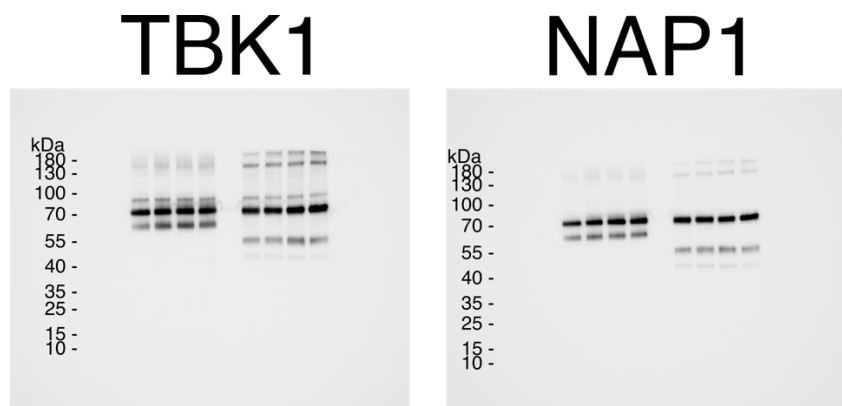

Extended Data Figure 4F

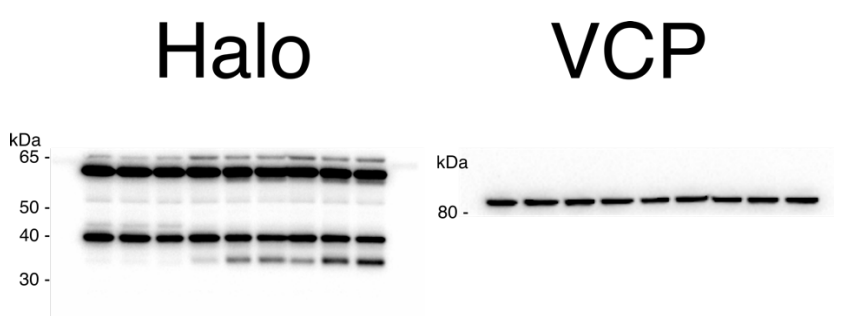

Supplement: 41594_2024_1338_MOESM22_ESM.pdf [file 41594_2024_1338_MOESM22_ESM.pdf]
